# Supplementary material for: Introducing MdTFL1 Promotes Heading Date and Produces Semi-Draft Phenotype in Rice
Source: MDPI journal article supplement (doi:10.3390/ijms241210365), 2023-06-20
Supplement: s1 [file s1]

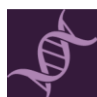

Article

# Introducing *MdTFL1* Promotes Heading Date and Produces High-Throughput Phenotyping in Rice

Van Giap Do *et al.*

## Supplementary Data

- Table S1. Sequences of primers used for gene cloning and genomic DNA PCR
- Table S2. Sequences of primers used for RT-PCR and qRT-PCR
- Figure S1. Genomic DNA PCR from rice callus
- Figure S2. Heading date of T0 (the year 2020) and T1 (the year 2021) plants
- Figure S3. Expression profile of endogenous-flowering-related genes in rice callus
- Figure S4. Phenotype and flowering time of T0 (the year 2020) and T1 (the year 2021) plants
- Figure S5. Phenotype of T2 plants (the year 2022)
- Figure S6. Expression profile of endogenous flowering-related gene and GA synthesis pathway genes in rice plants

**Table S1.** Sequences of primers used for gene cloning and genomic DNA PCR

| Gene          | Description                   |   | Primer sequence (5'-3')    | Note                                                   |
|---------------|-------------------------------|---|----------------------------|--------------------------------------------------------|
| <i>MdTFL1</i> | TFL1-like protein             | F | GGGGTACCATGAAAAGAGCCTCGGAG | Amplified the full length of target gene <i>MdTFL1</i> |
|               |                               | R | CGGGATCCCTAGCGTCTTCTAGCTG  |                                                        |
| <i>hptII</i>  | Hygromycin phosphotransferase | F | CTCGGAGGGCGAAGAATCTC       | Amplified 563 bp of PCR product of <i>hptII</i> gene   |
|               |                               | R | CAATGACCGCTGTTATGCGG       |                                                        |

**Table S2.** Sequences of primers used for RT-PCR and qRT-PCR

| Gene                    | Description                                         |        | Primer sequence (5'-3')                          | Accession No.  |
|-------------------------|-----------------------------------------------------|--------|--------------------------------------------------|----------------|
| <i>MdTFL1</i>           | TFL1-like protein                                   | F<br>R | CTCGGAGGGCGAAGAATCTC<br>CAATGACCGCTGTTATGCGG     | AB052994.1     |
| <i>OsUbi1</i>           | Polyubiquitin1                                      | F<br>R | CACGGTTCAACAACATCCAG<br>TGAAGACCCTGACTGGGAAG     | NC_029261.1    |
| <i>OsEHD1</i>           | EARLY HEADING DATE 1                                | F<br>R | TGGAGTATGGATCGCCCATT<br>GCAGTTGCGGTTTCTAGGGT     | NC_029265.1    |
| <i>OsHD1</i>            | HEADING DATE 1                                      | F<br>R | CACAATGCTGAGTGAGCAGC<br>AGATGAACTCACGCTGTTGC     | NC_029261.1    |
| <i>OsHD3B</i>           | HEADING DATE 3B-like                                | F<br>R | GAATGGCCAGGTGCGATTGGA<br>CGCTTCCTACCAATTAGCGTG   | NC_029261.1    |
| <i>RFT</i>              | FLOWERING LOCUS T                                   | F<br>R | CTGGTTTGCTTGGACTTGGC<br>AGCTATGCCCTAGGTCCTCT     | NC_029264.1    |
| <i>OsGhd7</i>           | Transcription factor GHD7-like                      | F<br>R | TCCGTTTCATGTCGATGGGAC<br>CGGGAAGACGAAGGGGAATC    | NC_029262.1    |
| <i>OsMADS14</i>         | MADS-box transcription factor 14-like               | F<br>R | AGCGCTCATAACGTTCAAGGA<br>TGTGCATTTGTTGTTGAGATGGA | NC_029258.1    |
| <i>OsMADS18</i>         | MADS-box transcription factor 18-like               | F<br>R | CAC TAACCGGGAGGAGCAAA<br>GGTGAGTGCGAGGGGCAAAAT   | NC_029262.1    |
| <i>OsMADS50</i>         | MADS-box transcription factor 50-like               | F<br>R | TTATCCCAATTGGAGGGGCG<br>ACCACCCTCCTTGCCCTTTT     | NC_029258.1    |
| <i>Gn1a/<br/>OsCKX2</i> | Grain number 1a/<br>Cytokinin oxidase/dehydrogenase | F<br>R | GAGGTGTTCTACACGGTGGG<br>GCAGGTACTGCTTGTTAGGCT    | AB205193.1     |
| <i>OsEXPA3</i>          | Alpha-expansin-3                                    | F<br>R | GGCAGAGCCTGTCCTTCATT<br>CAGAAGTGCACCCAAGAGGT     | NM_001420295.1 |
| <i>OsEXPA4</i>          | Expansin-A4-like                                    | F<br>R | ATAGCACGGTGTCTTCTTTCG<br>AGCCCAAAACCTCTTCTCCAC   | NM_001420547.1 |
| <i>OsGA20ox3</i>        | Gibberellin 20 oxidase 3                            | F<br>R | AGTATCGCACCGTCACGTTT<br>GCCGCTGTGAGGATCAGATT     | AK060318.1     |
| <i>OsCPS2</i>           | ent-copalyl diphosphate synthase 2-like             | F<br>R | CGGCAATGCTTCTAACAGCC<br>CGATTGTGCGAACTAGCAGC     | AB066271.1     |
| <i>OsHD3A</i>           | HEADING DATE 3A-like                                | F<br>R | CTAGCGCACTTGTTTTTCATGC<br>GACGCTGCAGTAGTACCAGG   | NC_029261.1    |
| <i>OsKO1</i>            | ent-kaurene oxidase 1-like protein                  | F<br>R | CGGAAGAAGCCCCAATCCTT<br>TTTATTGTCATGCAGCTGTTCC   | NC_029261.1    |
| <i>OsKO2</i>            | ent-kaurene oxidase 2-like protein                  | F<br>R | CTACAGAAGAAGCCCCGGTT<br>TTCATTGTCATGCAGCTGTTCC   | NC_029261.1    |

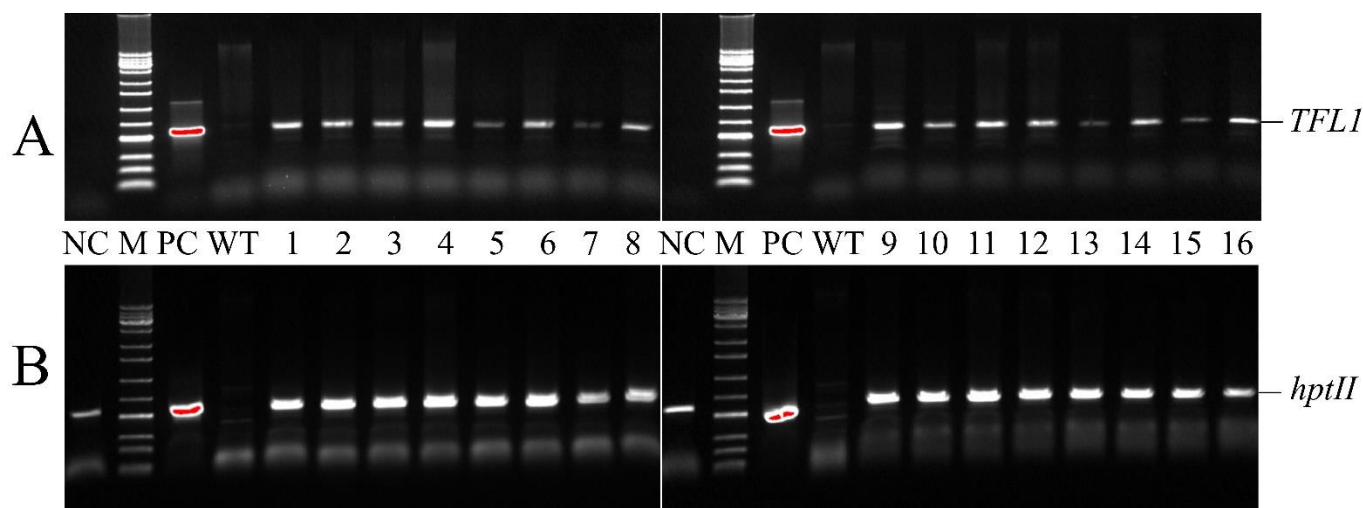

**Figure S1.** Genomic DNA PCR from rice callus. Detection of the target gene (*MdTFL1*) (A) and selection marker hygromycin phosphotransferase (*hptII*) (B) in transgenic rice callus. Lane PC, plasmid DNA of 3D::MdTFL1 used as positive controls; lane NC, genomic DNA of transgenic rice callus transformed with vector pMYD319 used as a mock; lane WT, genomic DNA of wild-type (non-transgenic callus) used as a negative control; lanes 1-16, independent 3D::MdTFL1 transgenic callus lines; lane M, 1 Kb plus DNA ladder marker.

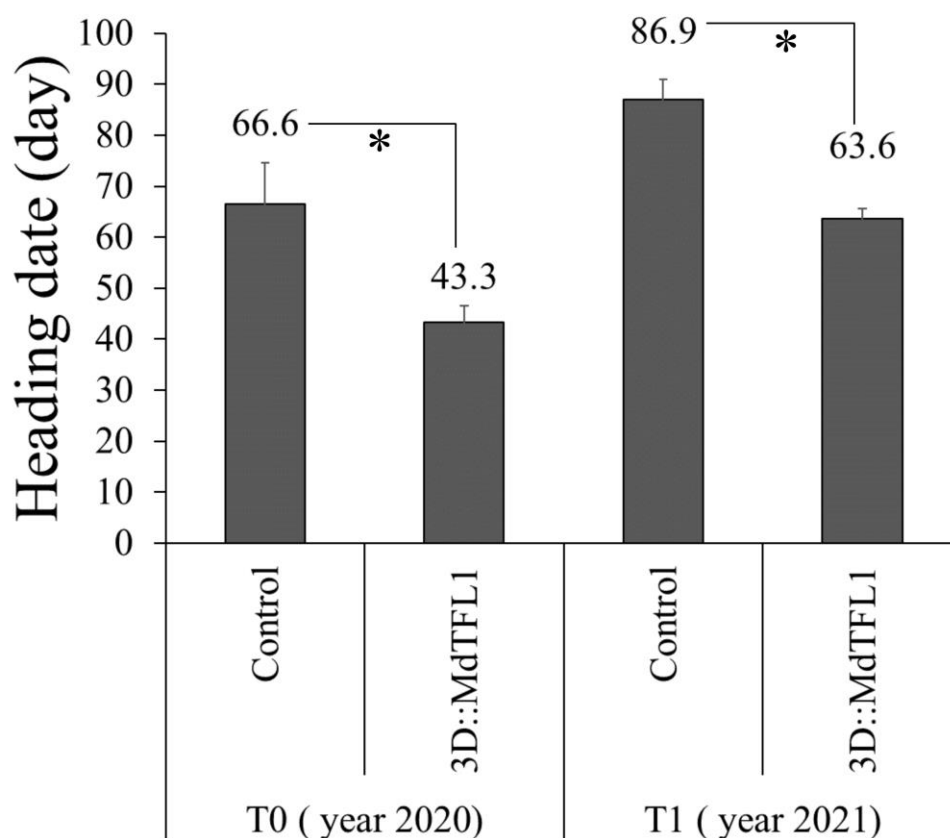

**Figure S2.** Heading date of T0 (the year 2020) and T1 (the year 2021) plants. The heading date of T0 plants was evaluated when the first panicle emerged after the in vitro seedlings were transferred to the soil. T1 plants were germinated from the seed of T0 plants, and their heading date was evaluated when the first panicle emerged after T1 seed sowing. Data are presented as mean  $\pm$  SD ( $n \geq 20$ ). The asterisks indicate significant differences compared to control (WT and mock) ( $p < 0.05$ ).

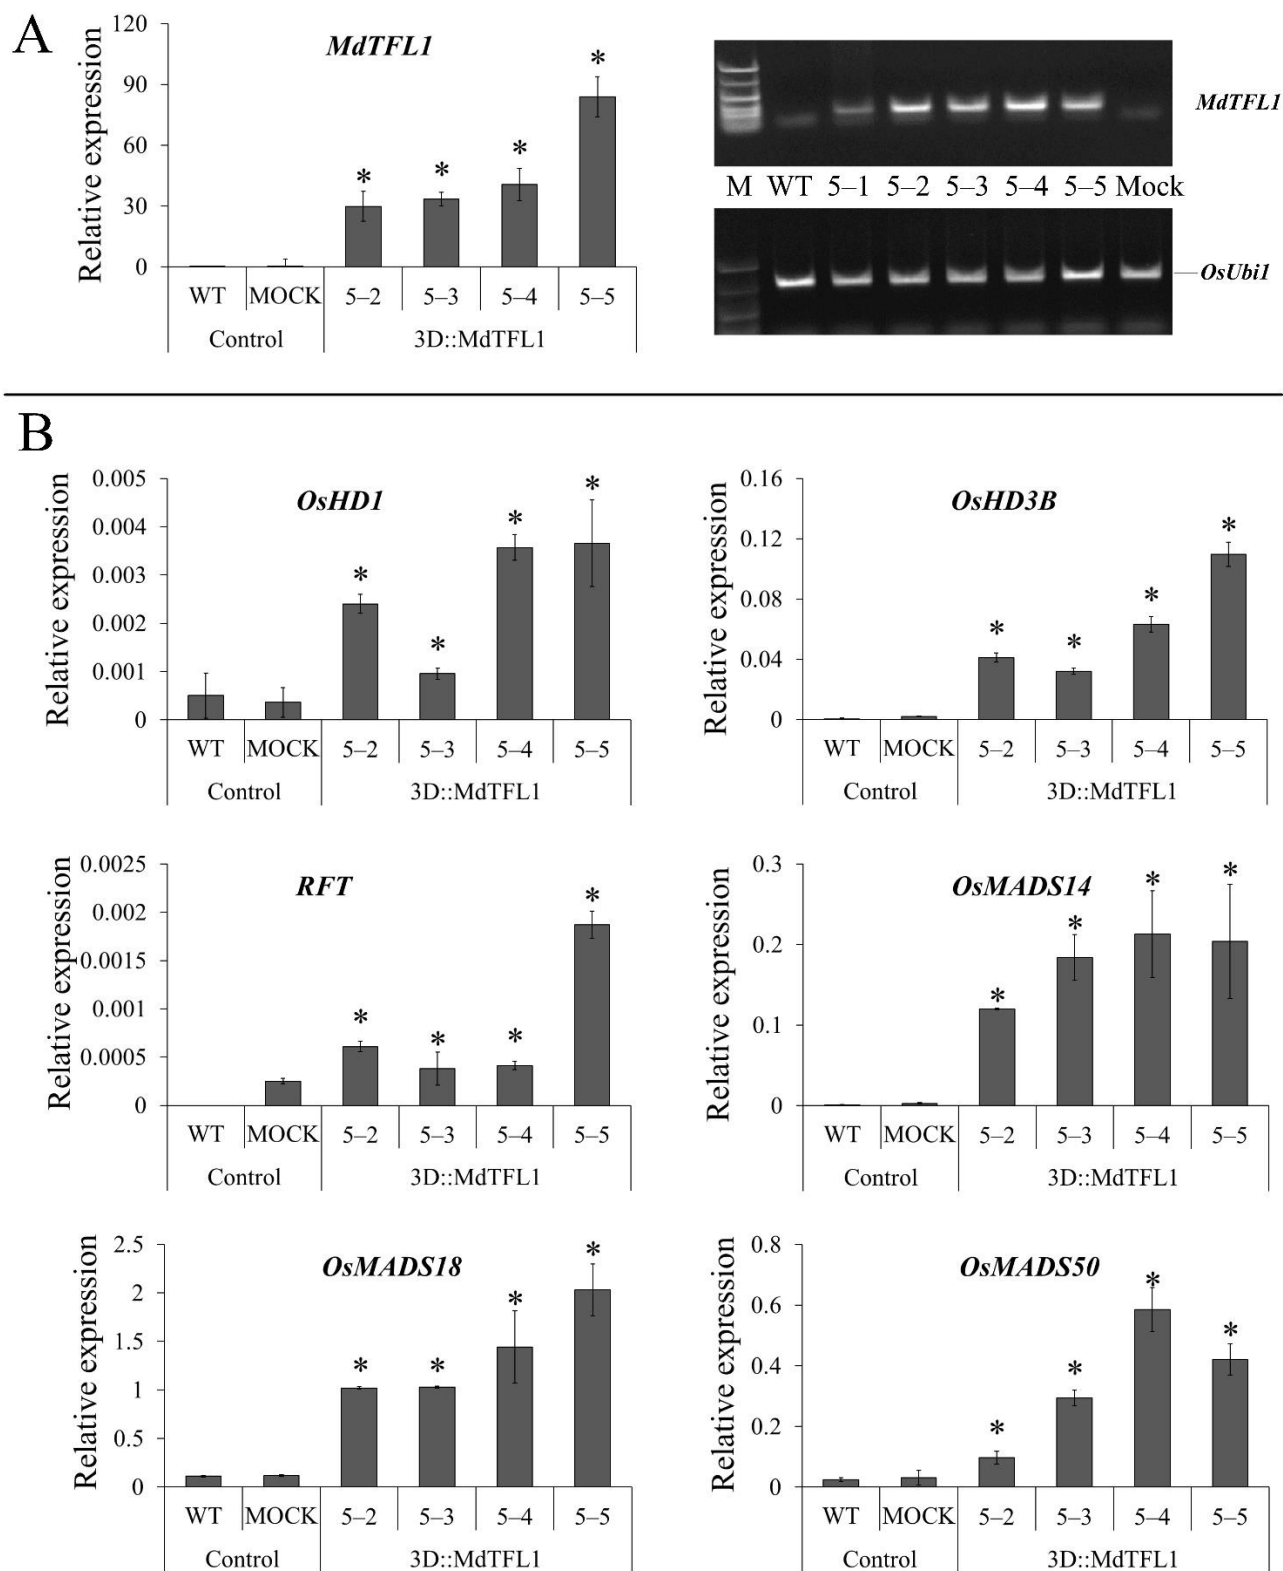

**Figure S3.** Expression profile of endogenous-flowering-related genes in rice callus. The expression level of *MdTFL1* (A) and rice flowering-related genes (B) was normalized to *OsUbi1*. Data represent the mean  $\pm$  SD from three biological replicates. The asterisks indicate significant differences compared to control (WT and mock) ( $p < 0.05$ ).

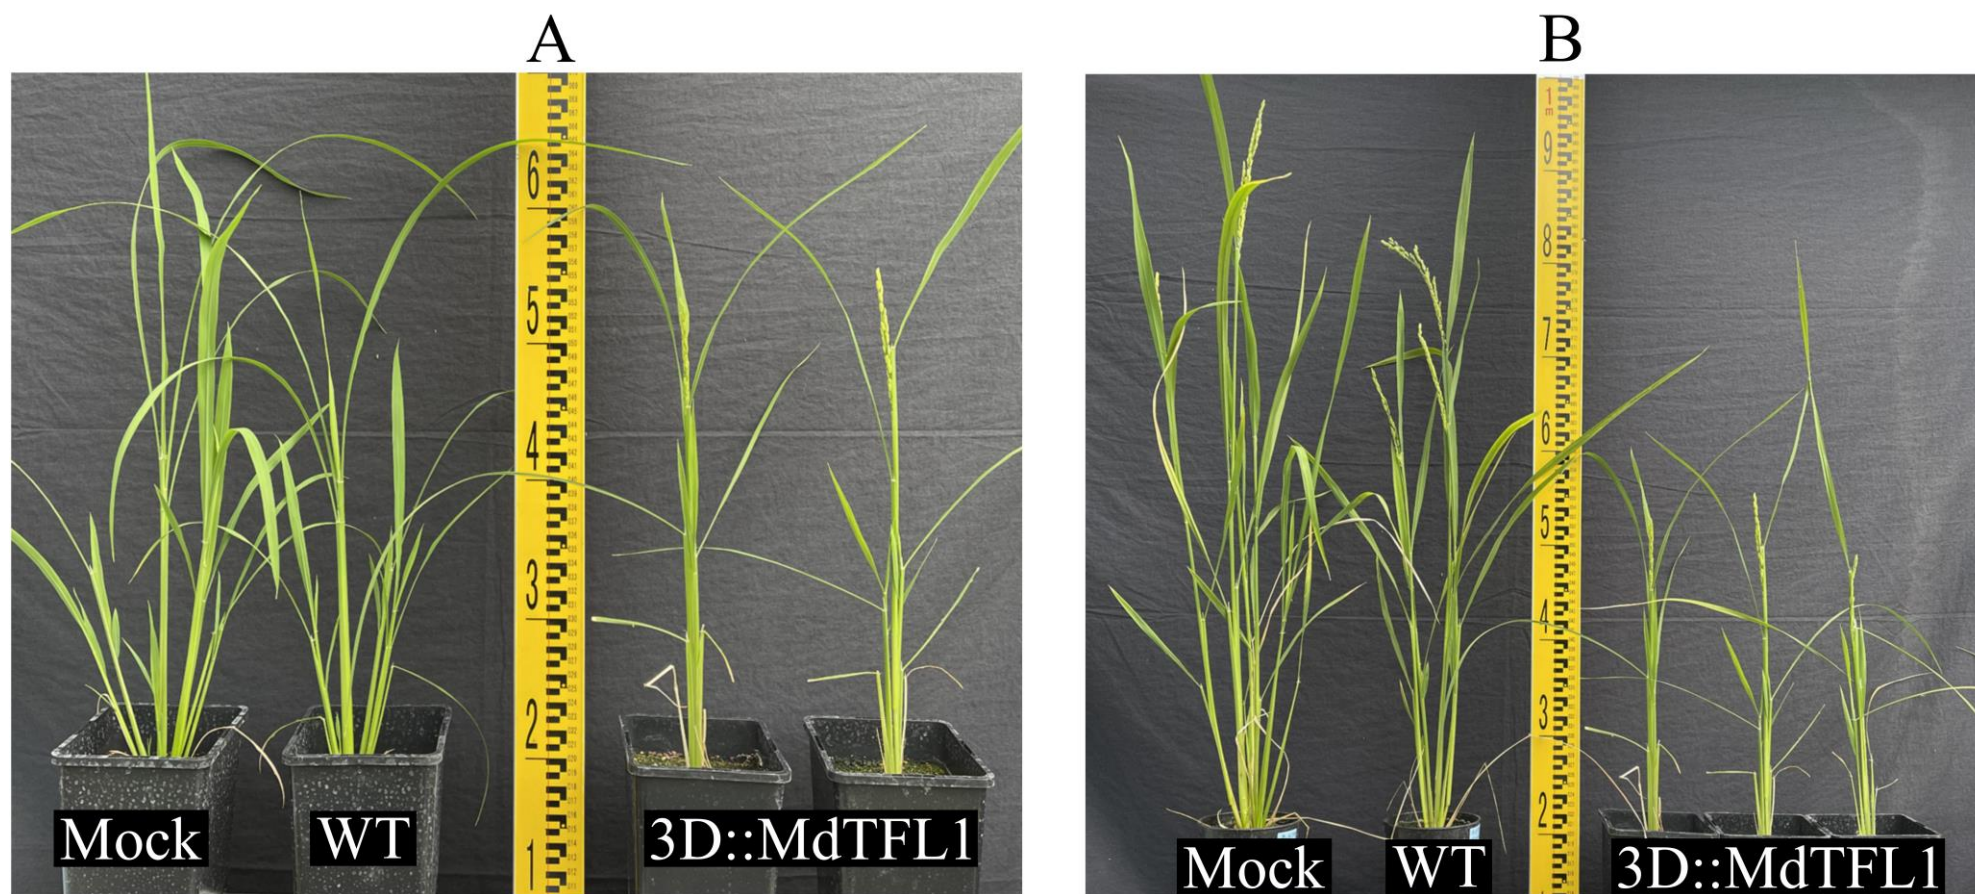

**Figure S4.** Phenotype of T0 plants (the year 2020) after transferring to the soil. (A) 3D::MdTFL1 transgenic rice plants showed early heading at 43 days after transferring the in vitro seedling to the soil while the control (mock and WT) plants remained at the vegetative stage. (B) Plant height of 3D::MdTFL1 transgenic rice plants was shorter than the control (mock and WT) plants at the same developmental stage (heading date).



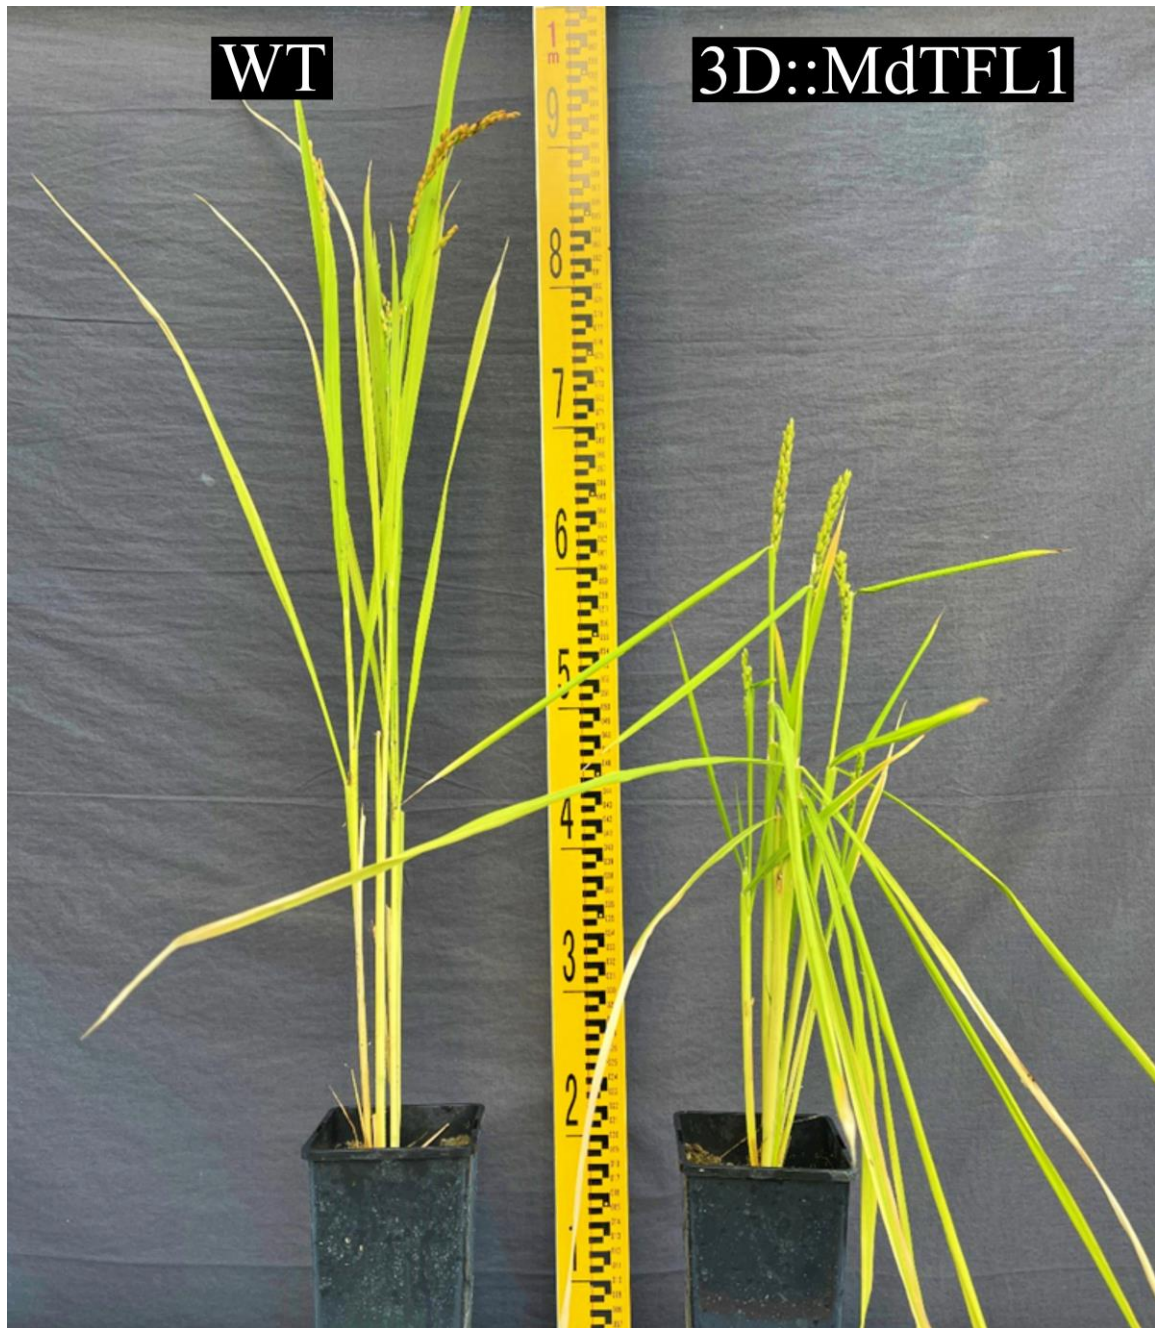

**Figure S5.** Phenotype of T2 plants (the year 2022). 3D::MdTFL1 transgenic rice plants showed a high-throughput phenotype that exhibited a semi-draft with inclined leaf angles.

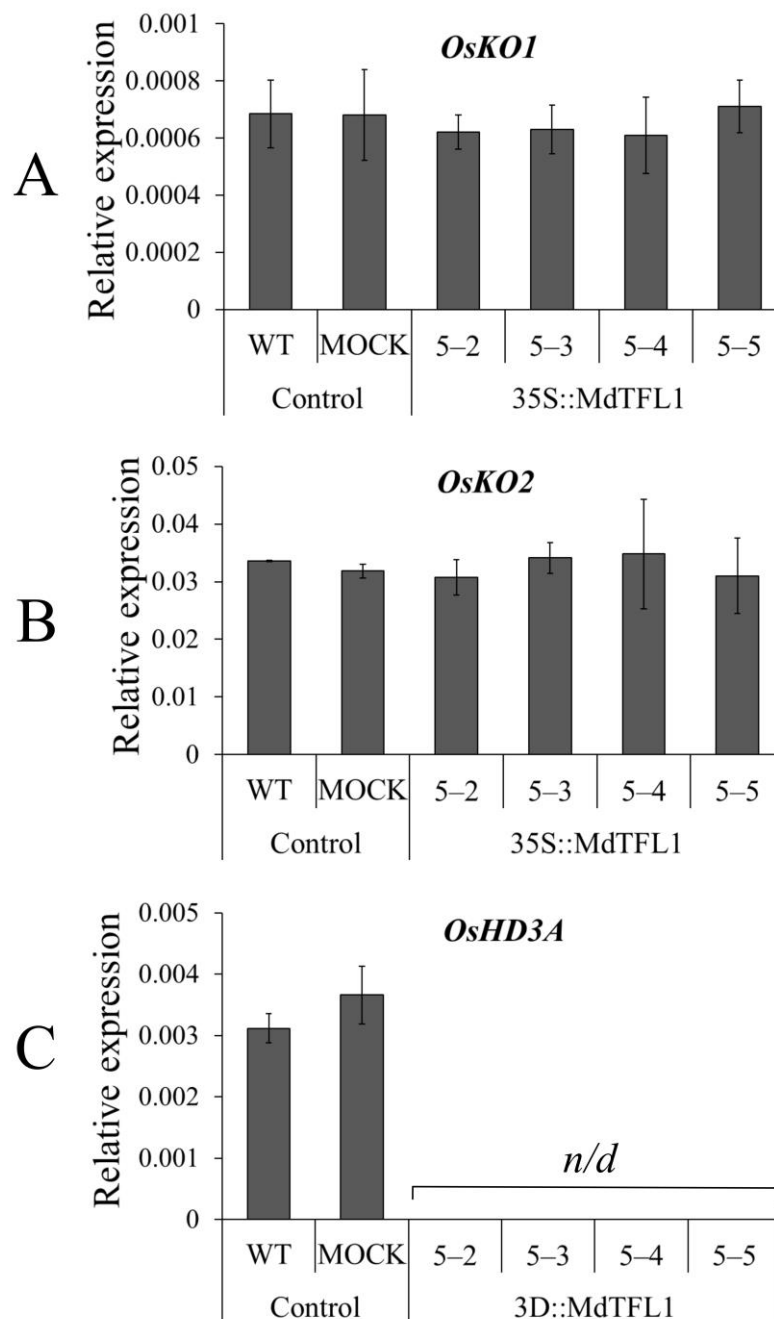

**Figure S6.** Expression profile of GA synthesis pathway and endogenous flowering-related genes and in rice plants. The expression level of *OsKO1* (A), *OsKO2* (B), and *OsHD3A* (A) was normalized to *OsUbi1*. Data represent the mean  $\pm$  SD from three biological replicates. *n/d* indicates *OsHD3A* was not detected in 35S::MdTFL1.
